# Supplementary material
Source: Research Square preprint supplement (doi:10.21203/rs.3.rs-10107168/v1)
Supplement: Supplementary file 2 [file 818d87b58bec083a7b488b9e.docx]

**Supplementary table 1: Full survey findings**

| 545 | **Overall (N=545)** |
| --- | --- |
| **Q5 Do any of your children have chronic (longstanding) medical conditions?** |  |
| N-Miss | 68 |
| No | 366 (76.7%) |
| Yes | 111 (23.3%) |
| **Q6 How often do you visit a pharmacy?** |  |
| N-Miss | 68 |
| A few times a month | 98 (20.5%) |
| Less than once a month | 170 (35.6%) |
| More than once a week | 6 (1.3%) |
| Once a month | 142 (29.8%) |
| Once a week | 16 (3.4%) |
| Rarely or never | 45 (9.4%) |
| **Q7 What type of pharmacy do you go to? (select all that apply)** |  |
| **A high street chain pharmacy (e.g. Boots, Superdrug)** |  |
| No | 261 (47.9) |
| Yes | 284 (52.1%) |
| **An independent pharmacy (not a chain)** |  |
| No | 237 (43.5%) |
| Yes | 308 (56.5%) |
| **Q8 What are the main reasons for you to visit a pharmacy? (Select all that apply) - Selected Choice** | |
| **Prescription medication** |  |
| No | 151 (27.7%) |
| Yes | 394 (72.3%) |
| **Self-care medication (e.g., paracetamol, hay fever treatment)** |  |
| No | 250 (45.9%) |
| Yes | 295 (54.1%) |
| **Body & skincare products** |  |
| No | 418 (76.7%) |
| Yes | 127 (23.3%) |
| **Printing photos** |  |
| No | 536 (98.3%) |
| Yes | 9 (1.7%) |
| **Advice from a pharmacist** |  |
| No | 357 (65.5%) |
| Yes | 188 (34.5%) |
| **Q9 Where would you go for advice for your child's illness or general health advice? Select all that apply - Selected Choice** | |
| **Websites (please state which)** |  |
| No | 280 (51.4%) |
| Yes | 265 (48.6%) |
| **Apps or social media (please state which)** |  |
| No | 511 (93.8%) |
| Yes | 34 (6.2%) |
| **Family/friends** |  |
| No | 319 (58.5%) |
| Yes | 226 (41.5%) |
| **Calling 111** |  |
| No | 312 (57.2%) |
| Yes | 233 (42.8%) |
| **Community pharmacy** |  |
| No | 316 (58.0%) |
| Yes | 229 (42.0%) |
| **GP / physician** |  |
| No | 124 (22.8%) |
| Yes | 421 (77.2%) |
| **Hospital** |  |
| No | 422 (77.4%) |
| Yes | 123 (22.6%) |
| **Accident & Emergency (A&E)** |  |
| No | 400 (73.4%) |
| Yes | 145 (26.6%) |
| **Leaflets** |  |
| No | 519 (95.2%) |
| Yes | 26 (4.8%) |
| **Books/magazines (please state which)** |  |
| No | 543 (99.6%) |
| Yes | 2 (0.4%) |
| **School/nursery** |  |
| No | 521 (95.6%) |
| Yes | 24 (4.4%) |
| **Other (please state)** |  |
| No | 536 (98.3%) |
| Yes | 9 (1.7%) |
| **Q10 Referring to the last time your child was unwell, can you indicate from the list below, which of the following illnesses your child had and where did you go for help?** | |
| **Q10_1 Fever** |  |
| **A&E** | 24 (4.4%) |
| **Urgent care / walk-in** |  |
| No | 523 (96.0%) |
| Yes | 22 (4.0%) |
| **GP** |  |
| No | 386 (70.8%) |
| Yes | 159 (29.2%) |
| **Call 111** |  |
| No | 473 (86.8%) |
| Yes | 72 (13.2%) |
| **Community pharmacy** |  |
| No | 434 (79.6%) |
| Yes | 111 (20.4%) |
| **Friends & family** |  |
| No | 439 (80.6%) |
| Yes | 106 (19.4%) |
| **Healthcare specialist** |  |
| No | 533 (97.8%) |
| Yes | 12 (2.2%) |
| **Q10_2 Generally unwell** |  |
| **A&E** |  |
| No | 539 (98.9%) |
| Yes | 6 (1.1%) |
| **Urgent care / walk-in** |  |
| No | 538 (98.7%) |
| Yes | 7 (1.3%) |
| **GP** |  |
| No | 398 (73.0%) |
| Yes | 147 (27.0%) |
| **Call 111** |  |
| No | 511 (93.8%) |
| Yes | 34 (6.2%) |
| **Community pharmacy** |  |
| No | 435 (79.8%) |
| Yes | 110 (20.2%) |
| **Friends & family** |  |
| No | 381 (69.9%) |
| Yes | 164 (30.1%) |
| **Healthcare specialist** |  |
| No | 534 (98.0%) |
| Yes | 11 (2.0%) |
| **Q10_3 Vomiting/diarrhoea** |  |
| **A&E** |  |
| No | 530 (97.2%) |
| Yes | 15 (2.8%) |
| **Urgent care / walk-in** |  |
| No | 536 (98.3%) |
| Yes | 9 (1.7%) |
| **GP** |  |
| No | 411 (75.4%) |
| Yes | 134 (24.6%) |
| **Call 111** |  |
| No | 500 (91.7%) |
| Yes | 45 (8.3%) |
| **Community pharmacy** |  |
| No | 436 (80.0%) |
| Yes | 109 (20.0%) |
| **Friends & family** |  |
| No | 394 (72.3%) |
| Yes | 151 (27.7%) |
| **Healthcare specialist** |  |
| No | 530 (97.2%) |
| Yes | 15 (2.8%) |
| **Q10_4 Cough without wheeze** |  |
| **A&E** |  |
| No | 543 (99.6%) |
| Yes | 2 (0.4%) |
| **Urgent care / walk-in** |  |
| No | 541 (99.3%) |
| Yes | 4 (0.7%) |
| **GP** |  |
| No | 445 (81.7%) |
| Yes | 100 (18.3%) |
| **Call 111** |  |
| No | 526 (96.5%) |
| Yes | 19 (3.5%) |
| **Community pharmacy** |  |
| No | 391 (71.7%) |
| Yes | 154 (28.3%) |
| **Friends & family** |  |
| No | 389 (71.4%) |
| Yes | 156 (28.6%) |
| **Healthcare specialist** |  |
| No | 529 (97.1%) |
| Yes | 16 (2.9%) |
| **Q10_5 Cough with wheeze** |  |
| **A&E** |  |
| No | 526 (96.5%) |
| Yes | 19 (3.5%) |
| **Urgent care / walk-in** |  |
| No | 527 (96.7%) |
| Yes | 18 (3.3%) |
| **GP** |  |
| No | 309 (56.7%) |
| Yes | 236 (43.3%) |
| **Call 111** |  |
| No | 499 (91.6%) |
| Yes | 46 (8.4%) |
| **Community pharmacy** |  |
| No | 476 (87.3%) |
| Yes | 69 (12.7%) |
| **Friends & family** |  |
| No | 479 (87.9%) |
| Yes | 66 (12.1%) |
| **Healthcare specialist** |  |
| No | 530 (97.2%) |
| Yes | 15 (2.8%) |
| **Q10_6 Cold symptoms** |  |
| **A&E** |  |
| No | 541 (99.3%) |
| Yes | 4 (0.7%) |
| **Urgent care / walk-in** |  |
| No | 540 (99.1%) |
| Yes | 5 (0.9%) |
| **GP** |  |
| No | 492 (90.3%) |
| Yes | 53 (9.7%) |
| **Call 111** |  |
| No | 535 (98.2%) |
| Yes | 10 (1.8%) |
| **Community pharmacy** |  |
| No | 371 (68.1%) |
| Yes | 174 (31.9%) |
| **Friends & family** |  |
| No | 352 (64.6%) |
| Yes | 193 (35.4%) |
| **Healthcare specialist** |  |
| No | 537 (98.5%) |
| Yes | 8 (1.5%) |
| **Q10_7 Skin rash** |  |
| **A&E** |  |
| No | 534 (98.0%) |
| Yes | 11 (2.0%) |
| **Urgent care / walk-in** |  |
| No | 524 (96.1%) |
| Yes | 21 (3.9%) |
| **GP** |  |
| No | 355 (65.1%) |
| Yes | 190 (34.9%) |
| **Call 111** |  |
| No | 504 (92.5%) |
| Yes | 41 (7.5%) |
| **Community pharmacy** |  |
| No | 386 (70.8%) |
| Yes | 159 (29.2%) |
| **Friends & family** |  |
| No | 480 (88.1%) |
| Yes | 65 (11.9%) |
| **Healthcare specialist** |  |
| No | 529 (97.1%) |
| Yes | 16 (2.9%) |
| **Q10_8 Sore throat** |  |
| **A&E** |  |
| No | 540 (99.1%) |
| Yes | 5 (0.9%) |
| **Urgent care / walk-in** |  |
| No | 539 (98.9%) |
| Yes | 6 (1.1%) |
| **GP** |  |
| No | 456 (83.7%) |
| Yes | 89 (16.3%) |
| **Call 111** |  |
| No | 531 (97.4%) |
| Yes | 14 (2.6%) |
| **Community pharmacy** |  |
| No | 362 (66.4%) |
| Yes | 183 (33.6%) |
| **Friends & family** |  |
| No | 404 (74.1%) |
| Yes | 141 (25.9%) |
| **Healthcare specialist** |  |
| No | 536 (98.3%) |
| Yes | 9 (1.7%) |
| **Q10_9 Fall (not serious)** |  |
| **A&E** |  |
| No | 513 (94.1%) |
| Yes | 32 (5.9%) |
| **Urgent care / walk-in** |  |
| No | 512 (93.9%) |
| Yes | 33 (6.1%) |
| **GP** |  |
| No | 480 (88.1%) |
| Yes | 65 (11.9%) |
| **Call 111** |  |
| No | 514 (94.3%) |
| Yes | 31 (5.7%) |
| **Community pharmacy** |  |
| No | 471 (86.4%) |
| Yes | 74 (13.6%) |
| **Friends & family** |  |
| No | 349 (64.0%) |
| Yes | 196 (36.0%) |
| **Healthcare specialist** |  |
| No | 535 (98.2%) |
| Yes | 10 (1.8%) |
| **Q10_10 Limb problem/ injury (not obviously serious)** |  |
| **A&E** |  |
| No | 492 (90.3%) |
| Yes | 53 (9.7%) |
| **Urgent care / walk-in** |  |
| No | 491 (90.1%) |
| Yes | 54 (9.9%) |
| **GP** |  |
| No | 413 (75.8%) |
| Yes | 132 (24.2%) |
| **Call 111** |  |
| No | 499 (91.6%) |
| Yes | 46 (8.4%) |
| **Community pharmacy** |  |
| No | 498 (91.4%) |
| Yes | 47 (8.6%) |
| **Friends & family** |  |
| No | 421 (77.2%) |
| Yes | 124 (22.8%) |
| **Healthcare specialist** |  |
| No | 532 (97.6%) |
| Yes | 13 (2.4%) |
| **Q10_11 Other (please specify)** |  |
| **A&E** |  |
| No | 478 (87.7%) |
| Yes | 67 (12.3%) |
| **Urgent care / walk-in** |  |
| No | 529 (97.1%) |
| Yes | 16 (2.9%) |
| **GP** |  |
| No | 443 (81.3%) |
| Yes | 102 (18.7%) |
| **Call 111** |  |
| No | 514 (94.3%) |
| Yes | 31 (5.7%) |
| **Community pharmacy** |  |
| No | 486 (89.2%) |
| Yes | 59 (10.8%) |
| **Friends & family** |  |
| No | 403 (73.9%) |
| Yes | 142 (26.1%) |
| **Healthcare specialist** |  |
| No | 515 (94.5%) |
| Yes | 30 (5.5%) |
| **Q11 How easy is it to get an appointment/advice from your GP about your child's health when needed?** | |
| N-Miss | 102 |
| Extremely difficult | 50 (11.3%) |
| Extremely easy | 30 (6.8%) |
| Neither easy nor difficult | 76 (17.2%) |
| Somewhat difficult | 133 (30.0%) |
| Somewhat easy | 154 (34.8%) |
| **Q12 On a scale of 1 to 5, where 1 is not confident at all and 5 is highly confident, rate how you feel about getting advice about your children’s health and pregnancy from your community pharmacy regarding the following:** | |
| **Q12_1 Fever** |  |
| N-Miss | 146 |
| Fairly confident | 178 (44.6%) |
| High confidence | 81 (20.3%) |
| Low confidence | 24 (6.0%) |
| No confidence | 9 (2.3%) |
| Somewhat confident | 107 (26.8%) |
| **Q12_2 Generally unwell** |  |
| N-Miss | 146 |
| Fairly confident | 165 (41.4%) |
| High confidence | 83 (20.8%) |
| Low confidence | 33 (8.3%) |
| No confidence | 8 (2.0%) |
| Somewhat confident | 110 (27.6%) |
| **Q12_3 Vomiting / diarrhoea** |  |
| N-Miss | 146 |
| Fairly confident | 164 (41.1%) |
| High confidence | 81 (20.3%) |
| Low confidence | 33 (8.3%) |
| No confidence | 11 (2.8%) |
| Somewhat confident | 110 (27.6%) |
| **Q12_4 Cough without wheeze** |  |
| N-Miss | 146 |
| Fairly confident | 169 (42.4%) |
| High confidence | 100 (25.1%) |
| Low confidence | 22 (5.5%) |
| No confidence | 5 (1.3%) |
| Somewhat confident | 103 (25.8%) |
| **Q12_5 Cough with wheeze** |  |
| N-Miss | 146 |
| Fairly confident | 139 (34.8%) |
| High confidence | 55 (13.8%) |
| Low confidence | 80 (20.1%) |
| No confidence | 18 (4.5%) |
| Somewhat confident | 107 (26.8%) |
| **Q12_6 Cold symptoms** |  |
| N-Miss | 146 |
| Fairly confident | 176 (44.1%) |
| High confidence | 140 (35.1%) |
| Low confidence | 10 (2.5%) |
| No confidence | 3 (0.8%) |
| Somewhat confident | 70 (17.5%) |
| **Q12_7 Sore throat** |  |
| N-Miss | 146 |
| Fairly confident | 172 (43.1%) |
| High confidence | 125 (31.3%) |
| Low confidence | 20 (5.0%) |
| No confidence | 2 (0.5%) |
| Somewhat confident | 80 (20.1%) |
| **Q12_8 Skin rash** |  |
| N-Miss | 146 |
| Fairly confident | 154 (38.6%) |
| High confidence | 61 (15.3%) |
| Low confidence | 50 (12.5%) |
| No confidence | 8 (2.0%) |
| Somewhat confident | 126 (31.6%) |
| **Q12_9 Fall (not serious)** |  |
| N-Miss | 146 |
| Fairly confident | 141 (35.3%) |
| High confidence | 62 (15.5%) |
| Low confidence | 68 (17.0%) |
| No confidence | 27 (6.8%) |
| Somewhat confident | 101 (25.3%) |
| **Q12_10 Limb problem or minor injury** |  |
| N-Miss | 146 |
| Fairly confident | 112 (28.1%) |
| High confidence | 47 (11.8%) |
| Low confidence | 100 (25.1%) |
| No confidence | 35 (8.8%) |
| Somewhat confident | 105 (26.3%) |
| **Q12_11 Children's vaccinations** |  |
| N-Miss | 146 |
| Fairly confident | 149 (37.3%) |
| High confidence | 77 (19.3%) |
| Low confidence | 41 (10.3%) |
| No confidence | 23 (5.8%) |
| Somewhat confident | 109 (27.3%) |
| **Q12_15 For weaning a new baby** |  |
| N-Miss | 146 |
| Fairly confident | 114 (28.6%) |
| High confidence | 41 (10.3%) |
| Low confidence | 89 (22.3%) |
| No confidence | 28 (7.0%) |
| Somewhat confident | 127 (31.8%) |
| **Q12_16 General advice for infant health** |  |
| N-Miss | 146 |
| Fairly confident | 152 (38.1%) |
| High confidence | 58 (14.5%) |
| Low confidence | 54 (13.5%) |
| No confidence | 19 (4.8%) |
| Somewhat confident | 116 (29.1%) |
| **Q14 To what extent do you agree with following statements?** |  |
| **Q14_1 I would seek advice from community pharmacist about my child’s health if a pharmacist was specially trained to provide children's consultations** | |
| N-Miss | 146 |
| Agree | 240 (60.2%) |
| Disagree | 5 (1.3%) |
| Neither agree or disagree | 19 (4.8%) |
| Strongly agree | 134 (33.6%) |
| Strongly disagree | 1 (0.3%) |
| **Q14_2 The cost of paying for over-the-counter medicine, discourages me from seeking advice from the community pharmacy team.** | |
| N-Miss | 107 |
| Agree | 83 (18.9%) |
| Disagree | 154 (35.2%) |
| Neither agree or disagree | 90 (20.5%) |
| Strongly agree | 29 (6.6%) |
| Strongly disagree | 82 (18.7%) |
| **Q14_3 I would feel comfortable seeking support from the community pharmacy if it offered a children’s consultation service along with free over-the-counter medicine when needed.** | |
| N-Miss | 146 |
| Agree | 196 (49.1%) |
| Disagree | 6 (1.5%) |
| Neither agree or disagree | 34 (8.5%) |
| Strongly agree | 160 (40.1%) |
| Strongly disagree | 3 (0.8%) |
| **Q15 According to your personal experience, which of the following do you feel has provided you with the most useful and trusted information about your children’s health?** | |
| **Q15_1 Websites (please state which)** |  |
| No | 398 (73.0%) |
| Yes | 147 (27.0%) |
| **Q15_2 Apps or social media (please state which)** |  |
| No | 528 (96.9%) |
| Yes | 17 (3.1%) |
| **Q15_3 Family/friends** |  |
| No | 450 (82.6%) |
| Yes | 95 (17.4%) |
| **Q15_4 NHS 111** |  |
| No | 397 (72.8%) |
| Yes | 148 (27.2%) |
| **Q15_5 Community pharmacy** |  |
| No | 379 (69.5%) |
| Yes | 166 (30.5%) |
| **Q15_6 GP** |  |
| No | 227 (41.7%) |
| Yes | 318 (58.3%) |
| **Q15_7 Hospital specialist** |  |
| No | 400 (73.4%) |
| Yes | 145 (26.6%) |
| **Q15_8 Leaflets** |  |
| No | 536 (98.3%) |
| Yes | 9 (1.7%) |
| **Q15_9 Books/magazines (please state which)** |  |
| No | 542 (99.4%) |
| Yes | 3 (0.6%) |
| **Q15_10 School/nursery** |  |
| No | 537 (98.5%) |
| Yes | 8 (1.5%) |
| **Q16 Have you had/will you have your child vaccinated? - Selected Choice** |  |
| N-Miss | 109 |
| No (please specify why) | 9 (2.1%) |
| Yes | 427 (97.9%) |
| **Q16_2_TEXT Have you had/will you have your child vaccinated? - No (please specify why) - Text** | |
| N-Miss | 538 |
| Don't trust it | 1 (14.3%) |
| Had baby vaccinations, but would no longer do so | 1 (14.3%) |
| I don't think they are as they say on the bottle so to speak | 1 (14.3%) |
| We wanted to wait until they are four. | 1 (14.3%) |
| don't want to risk my child | 1 (14.3%) |
| i dont want them too | 1 (14.3%) |
| vaccines are dangerous | 1 (14.3%) |
| **Q17 Would you consider vaccinating your child at your local pharmacy? - Selected Choice** | |
| N-Miss | 109 |
| No (please specify why) | 50 (11.5%) |
| Yes | 386 (88.5%) |
| **Q17_2_TEXT Would you consider vaccinating your child at your local pharmacy? - No (please specify why) - Text** | |
| N-Miss | 508 |
| Different vaccines needed under advice from Hospital Consultant | 1 (2.7%) |
| Don't get vaccinations | 1 (2.7%) |
| Don’t feel they are specially trained enough | 1 (2.7%) |
| Generally no need when they can get it done in school | 1 (2.7%) |
| Gp | 1 (2.7%) |
| Heart condition | 1 (2.7%) |
| I do feel that young children have been exposed to so little in their lifetime that giving them a vaccination is something that should be done by a specialist. If pharmacist were trains on vaccination specifically for young children I'd be more inclined but | 1 (2.7%) |
| I prefer it done by a nurse | 1 (2.7%) |
| I prefer to vaccinate them where there is a doctor or nurse around | 1 (2.7%) |
| I trust a GP | 1 (2.7%) |
| I would trust my GP/nurse more | 1 (2.7%) |
| It would feel less clean and private | 1 (2.7%) |
| Like to go to specific vaccine clinic | 1 (2.7%) |
| My child will not have any further vaccinations | 1 (2.7%) |
| My community nurse offers support and advice specific to my personal needs and circumstances | 1 (2.7%) |
| Not a gp | 1 (2.7%) |
| Not needed | 1 (2.7%) |
| Our pharmacy is tiny- there's literally no space. It's quite a stressed environment with lots of staff in a small area and lots of ringing phones | 1 (2.7%) |
| Prefer nurse | 1 (2.7%) |
| This should be done within teh GP setting by their staff | 1 (2.7%) |
| Too small, does not have th espace and looks unhygienic. | 1 (2.7%) |
| Trust the GP or hospital | 1 (2.7%) |
| Unsure, it would depend on the set up. Would prefer a GP | 1 (2.7%) |
| Would rather it be done by my GP or nurse at our GP practice. | 1 (2.7%) |
| busy environment even in a private room they will be multi tasking | 1 (2.7%) |
| doesn't sound right. | 1 (2.7%) |
| dont want to | 1 (2.7%) |
| had them done at GP at recommended time so no need | 1 (2.7%) |
| i would want a trained nurse | 1 (2.7%) |
| in case of anaphalaxis | 1 (2.7%) |
| maybe force of habit using the gp for the last 6 years. I will find it hard to change | 1 (2.7%) |
| no reason | 1 (2.7%) |
| rather see the GP as never used them for these as do not see them as suitable to do these | 1 (2.7%) |
| safety | 1 (2.7%) |
| unless they were fully trained in children's vaccinations | 1 (2.7%) |
| vaccines are dangerous | 1 (2.7%) |
| won't do it | 1 (2.7%) |

**Supplementary table 2: : Pharmacy utilisation, reasons for visits and advice preferences:**

| **Q6 How often do you visit a pharmacy?** |  |
| --- | --- |
| N-Miss | 68 |
| A few times a month | 98 (20.5%) |
| Less than once a month | 170 (35.6%) |
| More than once a week | 6 (1.3%) |
| Once a month | 142 (29.8%) |
| Once a week | 16 (3.4%) |
| Rarely or never | 45 (9.4%) |
| **Q7 What type of pharmacy do you go to? (select all that apply)** |  |
| A high street chain pharmacy (e.g. Boots, Superdrug) | 284 (52.1%) |
| An independent pharmacy (not a chain) | 308 (56.5%) |
| **Q8 What are the main reasons for you to visit a pharmacy? (Select all that apply)** |  |
| Prescription medication | 394 (72.3%) |
| Self-care medication (e.g., paracetamol, hay fever treatment) | 295 (54.1%) |
| Body & skincare products | 127 (23.3%) |
| Printing photos | 9 (1.7%) |
| Advice from a pharmacist | 188 (34.5%) |
| **Q9 Where would you go for advice for your child's illness or general health advice? Select all that apply - Selected Choice** |  |
| Websites (please state which) | 265 (48.6%) |
| Apps or social media (please state which) | 34 (6.2%) |
| Family/friends | 226 (41.5%) |
| Calling 111 | 233 (42.8%) |
| Community pharmacy | 229 (42.0%) |
| GP / physician | 421 (77.2%) |
| Hospital | 123 (22.6%) |
| Accident & Emergency (A&E) | 145 (26.6%) |
| Leaflets | 26 (4.8%) |
| Books/magazines (please state which) | 2 (0.4%) |
| School/nursery | 24 (4.4%) |
| Other (please state) | 9 (1.7%) |

**Supplementary Table 3: Help‑seeking in the most recent illness by conditions**

| **Q10 Referring to the last time your child was unwell, can you indicate from the list below, which of the following illnesses your child had and where did you go for help?** | |
| --- | --- |
| **Q10_1 Fever** |  |
| A&E | 24 (4.4%) |
| Urgent care / walk-in | 22 (4.0%) |
| GP | 159 (29.2%) |
| Call 111 | 72 (13.2%) |
| Community pharmacy | 111 (20.4%) |
| Friends & family | 106 (19.4%) |
| Healthcare specialist | 12 (2.2%) |
| **Q10_2 Generally unwell** |  |
| A&E | 6 (1.1%) |
| Urgent care / walk-in | 7 (1.3%) |
| GP | 147 (27.0%) |
| Call 111 | 34 (6.2%) |
| Community pharmacy | 110 (20.2%) |
| Friends & family | 164 (30.1%) |
| Healthcare specialist | 11 (2.0%) |
| **Q10_3 Vomiting/diarrhoea** |  |
| A&E | 15 (2.8%) |
| Urgent care / walk-in | 9 (1.7%) |
| GP | 134 (24.6%) |
| Call 111 | 45 (8.3%) |
| Community pharmacy | 109 (20.0%) |
| Friends & family | 151 (27.7%) |
| Healthcare specialist | 15 (2.8%) |
| **Q10_4 Cough without wheeze** |  |
| A&E | 2 (0.4%) |
| Urgent care / walk-in | 4 (0.7%) |
| GP | 100 (18.3%) |
| Call 111 | 19 (3.5%) |
| Community pharmacy | 154 (28.3%) |
| Friends & family | 156 (28.6%) |
| Healthcare specialist | 16 (2.9%) |
| **Q10_5 Cough with wheeze** |  |
| A&E | 19 (3.5%) |
| Urgent care / walk-in | 18 (3.3%) |
| GP | 236 (43.3%) |
| Call 111 | 46 (8.4%) |
| Community pharmacy | 69 (12.7%) |
| Friends & family | 66 (12.1%) |
| Healthcare specialist | 15 (2.8%) |
| **Q10_6 Cold symptoms** |  |
| A&E | 4 (0.7%) |
| Urgent care / walk-in | 5 (0.9%) |
| GP | 53 (9.7%) |
| Call 111 | 10 (1.8%) |
| Community pharmacy | 174 (31.9%) |
| Friends & family | 193 (35.4%) |
| Healthcare specialist | 8 (1.5%) |
| **Q10_7 Skin rash** |  |
| A&E | 11 (2.0%) |
| Urgent care / walk-in | 21 (3.9%) |
| GP | 190 (34.9%) |
| Call 111 | 41 (7.5%) |
| Community pharmacy | 159 (29.2%) |
| Friends & family | 65 (11.9%) |
| Healthcare specialist | 16 (2.9%) |
| **Q10_8 Sore throat** |  |
| A&E | 5 (0.9%) |
| Urgent care / walk-in | 6 (1.1%) |
| GP | 89 (16.3%) |
| Call 111 | 14 (2.6%) |
| Community pharmacy | 183 (33.6%) |
| Friends & family | 141 (25.9%) |
| Healthcare specialist | 9 (1.7%) |
| **Q10_9 Fall (not serious)** |  |
| A&E | 32 (5.9%) |
| Urgent care / walk-in | 33 (6.1%) |
| GP | 65 (11.9%) |
| Call 111 | 31 (5.7%) |
| Community pharmacy | 74 (13.6%) |
| Friends & family | 196 (36.0%) |
| Healthcare specialist | 10 (1.8%) |
| **Q10_10 Limb problem/ injury (not obviously serious)** |  |
| A&E | 53 (9.7%) |
| Urgent care / walk-in | 54 (9.9%) |
| GP | 132 (24.2%) |
| Call 111 | 46 (8.4%) |
| Community pharmacy | 47 (8.6%) |
| Friends & family | 124 (22.8%) |
| Healthcare specialist | 13 (2.4%) |

**Supplementary table 4: Confidence in pharmacists by condition and life stage**

| **Q12 On a scale of 1 to 5, where 1 is not confident at all and 5 is highly confident, rate how you feel about getting advice about your children’s health from your community pharmacy regarding the following:** | |
| --- | --- |
| **Q12_1 Fever** |  |
| N-Miss | 146 |
| Fairly confident | 178 (44.6%) |
| High confidence | 81 (20.3%) |
| Low confidence | 24 (6.0%) |
| No confidence | 9 (2.3%) |
| Somewhat confident | 107 (26.8%) |
| **Q12_2 Generally unwell** |  |
| N-Miss | 146 |
| Fairly confident | 165 (41.4%) |
| High confidence | 83 (20.8%) |
| Low confidence | 33 (8.3%) |
| No confidence | 8 (2.0%) |
| Somewhat confident | 110 (27.6%) |
| **Q12_3 Vomiting / diarrhoea** |  |
| N-Miss | 146 |
| Fairly confident | 164 (41.1%) |
| High confidence | 81 (20.3%) |
| Low confidence | 33 (8.3%) |
| No confidence | 11 (2.8%) |
| Somewhat confident | 110 (27.6%) |
| **Q12_4 Cough without wheeze** |  |
| N-Miss | 146 |
| Fairly confident | 169 (42.4%) |
| High confidence | 100 (25.1%) |
| Low confidence | 22 (5.5%) |
| No confidence | 5 (1.3%) |
| Somewhat confident | 103 (25.8%) |
| **Q12_5 Cough with wheeze** |  |
| N-Miss | 146 |
| Fairly confident | 139 (34.8%) |
| High confidence | 55 (13.8%) |
| Low confidence | 80 (20.1%) |
| No confidence | 18 (4.5%) |
| Somewhat confident | 107 (26.8%) |
| **Q12_6 Cold symptoms** |  |
| N-Miss | 146 |
| Fairly confident | 176 (44.1%) |
| High confidence | 140 (35.1%) |
| Low confidence | 10 (2.5%) |
| No confidence | 3 (0.8%) |
| Somewhat confident | 70 (17.5%) |
| **Q12_7 Sore throat** |  |
| N-Miss | 146 |
| Fairly confident | 172 (43.1%) |
| High confidence | 125 (31.3%) |
| Low confidence | 20 (5.0%) |
| No confidence | 2 (0.5%) |
| Somewhat confident | 80 (20.1%) |
| **Q12_8 Skin rash** |  |
| N-Miss | 146 |
| Fairly confident | 154 (38.6%) |
| High confidence | 61 (15.3%) |
| Low confidence | 50 (12.5%) |
| No confidence | 8 (2.0%) |
| Somewhat confident | 126 (31.6%) |
| **Q12_9 Fall (not serious)** |  |
| N-Miss | 146 |
| Fairly confident | 141 (35.3%) |
| High confidence | 62 (15.5%) |
| Low confidence | 68 (17.0%) |
| No confidence | 27 (6.8%) |
| Somewhat confident | 101 (25.3%) |
| **Q12_10 Limb problem or minor injury** |  |
| N-Miss | 146 |
| Fairly confident | 112 (28.1%) |
| High confidence | 47 (11.8%) |
| Low confidence | 100 (25.1%) |
| No confidence | 35 (8.8%) |
| Somewhat confident | 105 (26.3%) |
| **Q12_11 Children's vaccinations** |  |
| N-Miss | 146 |
| Fairly confident | 149 (37.3%) |
| High confidence | 77 (19.3%) |
| Low confidence | 41 (10.3%) |
| No confidence | 23 (5.8%) |
| Somewhat confident | 109 (27.3%) |
| **Q12_12 Before becoming pregnant** |  |
| N-Miss | 146 |
| Fairly confident | 146 (36.6%) |
| High confidence | 58 (14.5%) |
| Low confidence | 56 (14.0%) |
| No confidence | 23 (5.8%) |
| Somewhat confident | 116 (29.1%) |
| **Q12_16 General advice for infant health** |  |
| N-Miss | 146 |
| Fairly confident | 152 (38.1%) |
| High confidence | 58 (14.5%) |
| Low confidence | 54 (13.5%) |
| No confidence | 19 (4.8%) |
| Somewhat confident | 116 (29.1%) |

**Supplementary table 5: Perceived acceptability for pharmacy services**

| **Q14 To what extent do you agree with following statements?** |  |
| --- | --- |
| **Q14_1 I would seek advice from community pharmacist about my child’s health if a pharmacist was specially trained to provide children's consultations** |  |
| N-Miss | 146 |
| Agree | 240 (60.2%) |
| Disagree | 5 (1.3%) |
| Neither agree or disagree | 19 (4.8%) |
| Strongly agree | 134 (33.6%) |
| Strongly disagree | 1 (0.3%) |
| **Q14_2 The cost of paying for over-the-counter medicine, discourages me from seeking advice from the community pharmacy team.** |  |
| N-Miss | 107 |
| Agree | 83 (18.9%) |
| Disagree | 154 (35.2%) |
| Neither agree or disagree | 90 (20.5%) |
| Strongly agree | 29 (6.6%) |
| Strongly disagree | 82 (18.7%) |
| **Q14_3 I would feel comfortable seeking support from the community pharmacy if it offered a children’s consultation service along with free over-the-counter medicine when needed.** |  |
| N-Miss | 146 |
| Agree | 196 (49.1%) |
| Disagree | 6 (1.5%) |
| Neither agree or disagree | 34 (8.5%) |
| Strongly agree | 160 (40.1%) |
| Strongly disagree | 3 (0.8%) |

**Supplementary Table 6: vaccination patten and willingness**

| **Q16 Have you had/will you have your child vaccinated? - Selected Choice** |  |
| --- | --- |
| N-Miss | 109 |
| No (please specify why) | 9 (2.1%) |
| Yes | 427 (97.9%) |
| **Q16_2_ Have you had/will you have your child vaccinated? - No (please specify why)** |  |
| N-Miss | 538 |
| Don't trust it | 1 (14.3%) |
| Had baby vaccinations, but would no longer do so | 1 (14.3%) |
| I don't think they are as they say on the bottle so to speak | 1 (14.3%) |
| We wanted to wait until they are four. | 1 (14.3%) |
| don't want to risk my child | 1 (14.3%) |
| i dont want them too | 1 (14.3%) |
| vaccines are dangerous | 1 (14.3%) |

**Supplementary Table 7: Chi-Square Tests - Demographic Disparities in Healthcare Utilization**

| **Outcome** | **Predictor** | **χ²** | **P-value** | **Effect** |
| --- | --- | --- | --- | --- |
| Seek Pharmacy Advice | Gender | 9.87 | **0.002** | Females significantly more likely (39% vs 21% males) |
| Seek Pharmacy Advice | Education | 4.52 | 0.210 | No significant stratification |
| Seek Pharmacy Advice | Age Group | 8.93 | **0.030** | Peak 45-54 years (48% advice-seeking) |
| Trust Pharmacy Info | Gender | 0.13 | 0.715 | No difference |
| Trust Pharmacy Info | Education | 1.44 | 0.487 | No stratification |
| Vaccinate at Pharmacy | Gender | 2.86 | 0.091 | Marginal female advantage (72% vs 68% males) |
| Vaccinate at Pharmacy | Education | 5.61 | **0.061** | Borderline: University+ (74% vs 68% secondary) |
| Vaccinate at Pharmacy | Chronic Condition | 3.84 | 0.050 | Marginal: Child health status influences decision |

**Supplementary Table 8: T-Tests - Continuous Outcome Comparisons**

| **Outcome Measure** | **Group Comparison** | **Mean Difference** | **t-statistic** | **P-value** |
| --- | --- | --- | --- | --- |
| **Confidence Scale (1-5)** | Female vs Male | +0.34 | 2.18 | **0.031** |
| **Confidence Scale** | White vs BAME | +0.12 | 0.76 | 0.450 |
| **Acute Confidence** | Female vs Male | +0.42 | 2.41 | **0.017** |
| **Maternal Confidence** | Female vs Male | +0.38 | 1.87 | 0.063 |
| **Attitudes** | Female vs Male | +0.28 | 1.54 | 0.126 |
| **Confidence** | Chronic vs No Chronic | -0.19 | -1.12 | 0.264 |
